# Supplementary material for: Effect of Probiotics in Stress-Associated Constipation Model in Zebrafish (Danio rerio) Larvae
Source: MDPI journal article supplement (doi:10.3390/ijms25073669), 2024-03-25
Supplement: s1 [file s1]

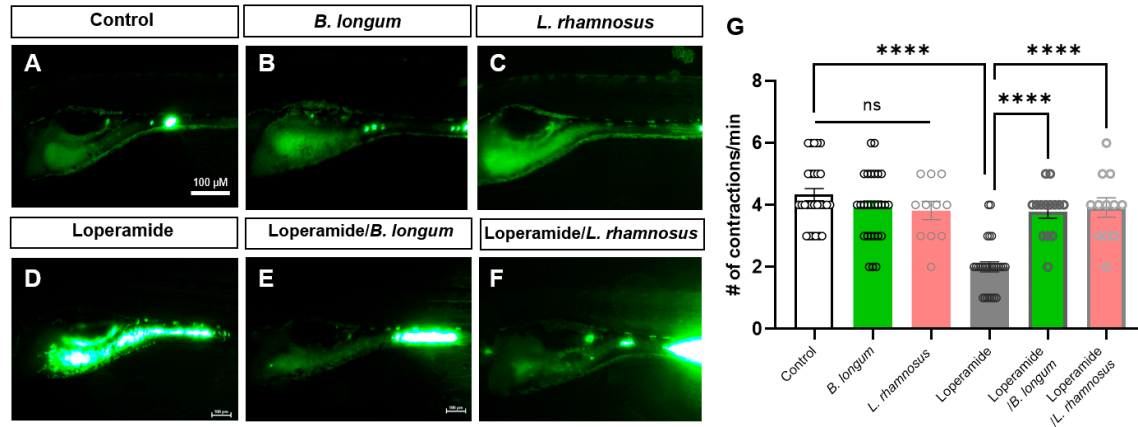

**Figure S1. Probiotics improves intestinal motility in loperamide-induced constipation.**

(A-F) Lateral images of the fluorescent tracer in the in the intestinal tract of zebrafish larvae. Scale bar: 100  $\mu$ m. (G) Comparison of the number of intestinal contraction in zebrafish larvae. n=27 for control, *B.longum*, loperamide group. n=11 for *L. rhamnosus* group. n=14 for loperamide/ *B.longum*, n=12 for loperamide/ *L. rhamnosus* group. One-way ANOVA with Tukey's multiple comparison test. ns, not significant; \*\*\*\*,  $p < 0.0001$ .

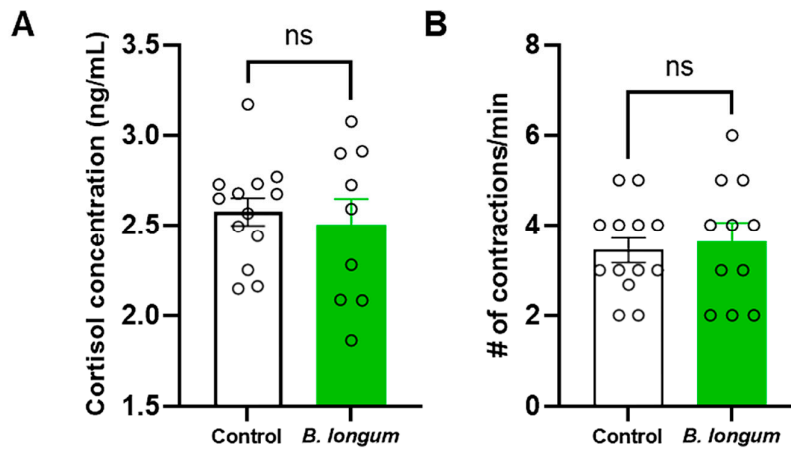

**Figure S2. The effect of *B.longum* on non-stressed zebrafish larvae** (A) Comparison of cortisol concentration between the non-stressed fish fed with *B. longum* and those fed without *B. longum*. n=13 for Control, n=9 for *B.longum* (B) Comparison of the number of intestinal contractions in zebrafish larvae. n=13 for Control, n=11 for *B.longum*. ns, not significant.
